# Supplementary material for: Implementation of a simple thermodynamic sea ice scheme, SICE version 1.0-38h1, within the ALADIN–HIRLAM numerical weather prediction system version 38h1
Source: Copernicus journal article supplement (doi:10.5194/gmd-11-3347-2018), 2018-08-21
Supplement: Supplementary file 1 [file gmd-11-3347-2018-supplement.zip]

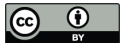

## *Supplement of*

# **Implementation of a simple thermodynamic sea ice scheme, SICE version 1.0-38h1, within the ALADIN–HIRLAM numerical weather prediction system version 38h1**

**Yurii Batrak et al.**

*Correspondence to:* Yurii Batrak ([yurii.batrak@met.no](mailto:yurii.batrak@met.no))

- [gmd-11-3347-2018-supplement-title-page.pdf](#)
- 38h1-sice
  - nam
    - \* [surfex\\_namelists.pm](#)
  - scr
    - \* [Canari](#)
    - \* [Interpol\\_ec\\_sst](#)
    - \* [Prep\\_ini\\_surfex](#)
  - src
    - \* [mse](#)
    - \* [surfex](#)
  - util
    - \* [gl](#)
    - \* [gl\\_grib\\_api](#)
- [supplementary-figures.pdf](#)

The copyright of individual parts of the supplement might differ from the CC BY 4.0 License.
