# Supplementary material for: Implementation of a simple thermodynamic sea ice scheme, SICE version 1.0-38h1, within the ALADIN–HIRLAM numerical weather prediction system version 38h1
Source: Copernicus journal article supplement (doi:10.5194/gmd-11-3347-2018), 2018-08-21
Supplement: Supplementary file 2 [file gmd-11-3347-2018-supplement.zip]

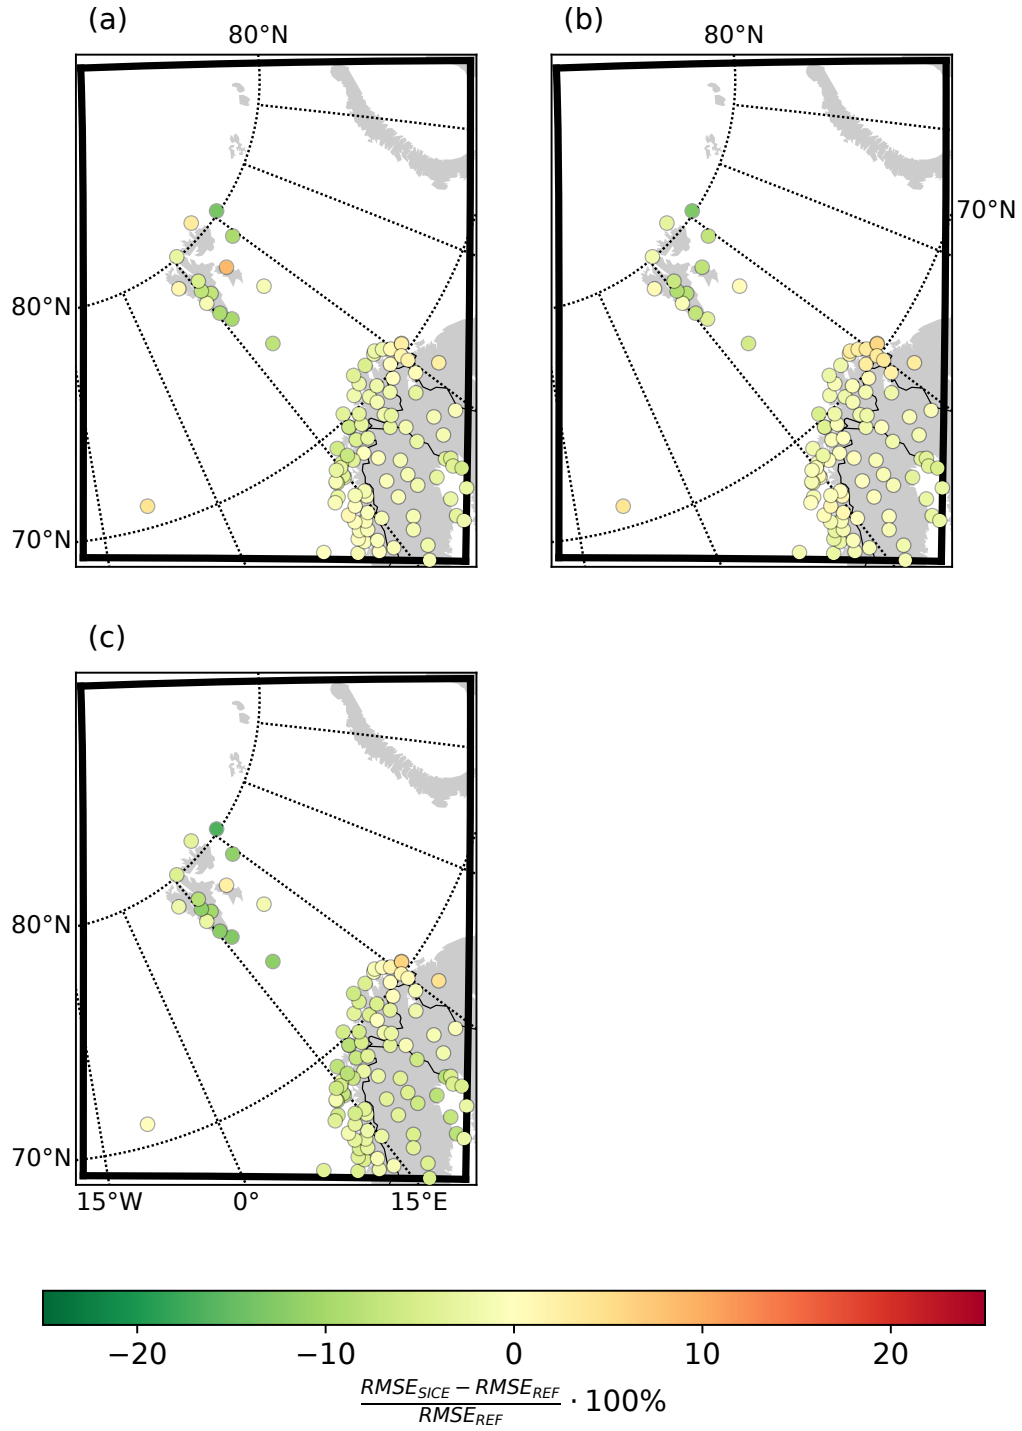

Figure S1: Relative change (in percent) of the root mean square error of mean sea level pressure induced by the SICE2D-NS, SICE2D-S and SICE2D-NS-CLIM experiments when compared to REF. Negative values mean that the root mean square error is smaller than in REF. a) SICE2D-NS, b) SICE2D-S, c) SICE2D-NS-CLIM.

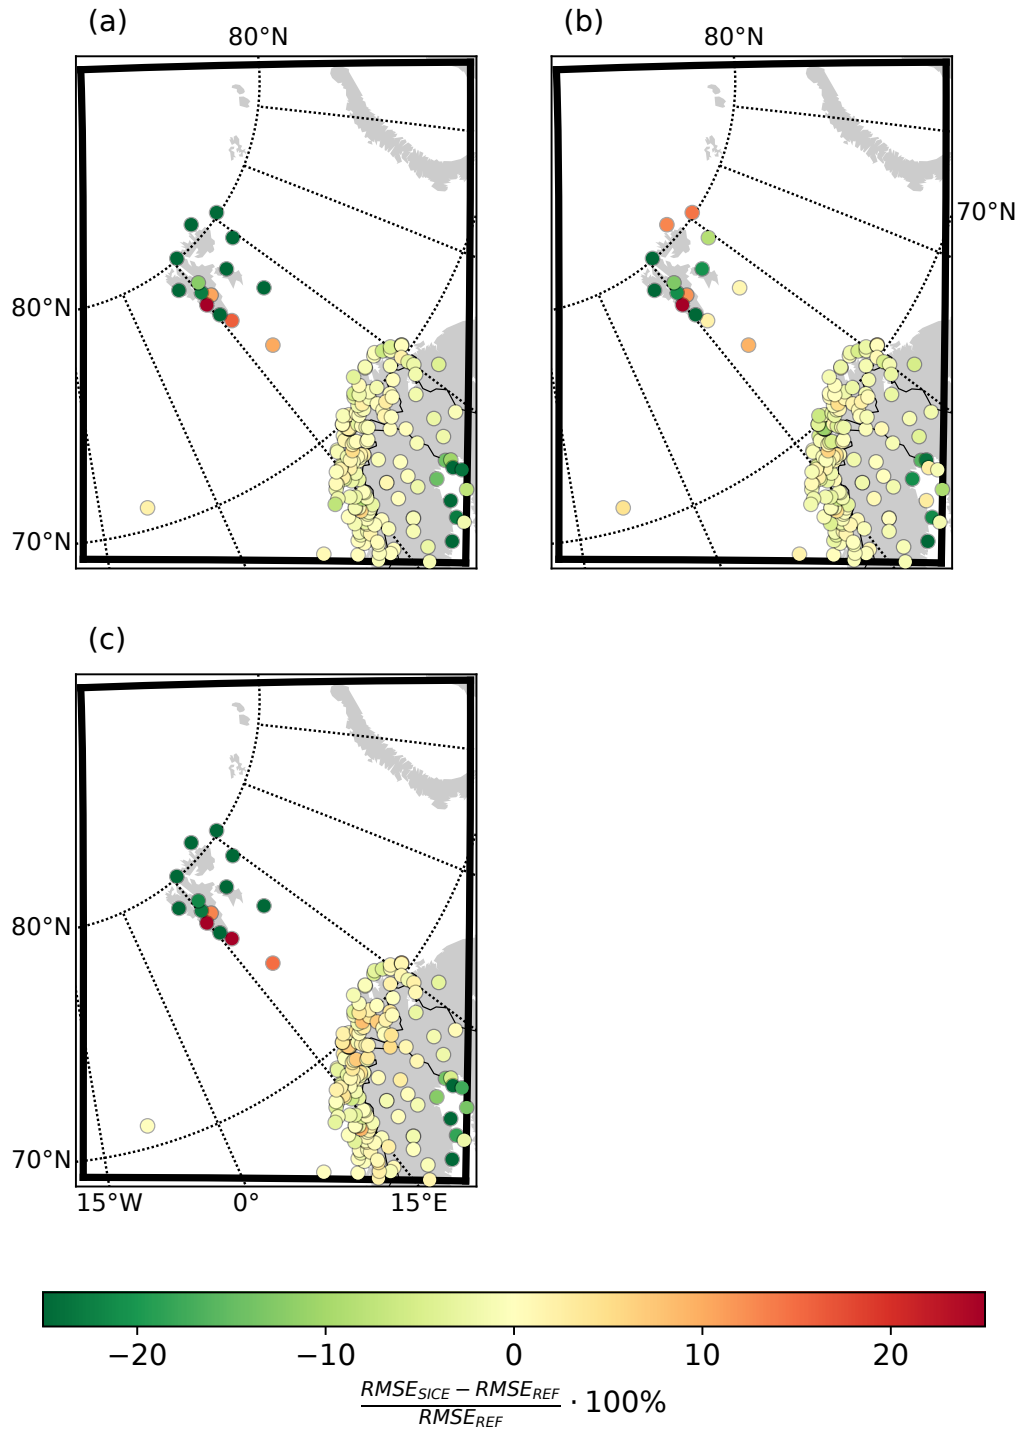

Figure S2: Same as Fig. S1 but for 2 metre temperature.

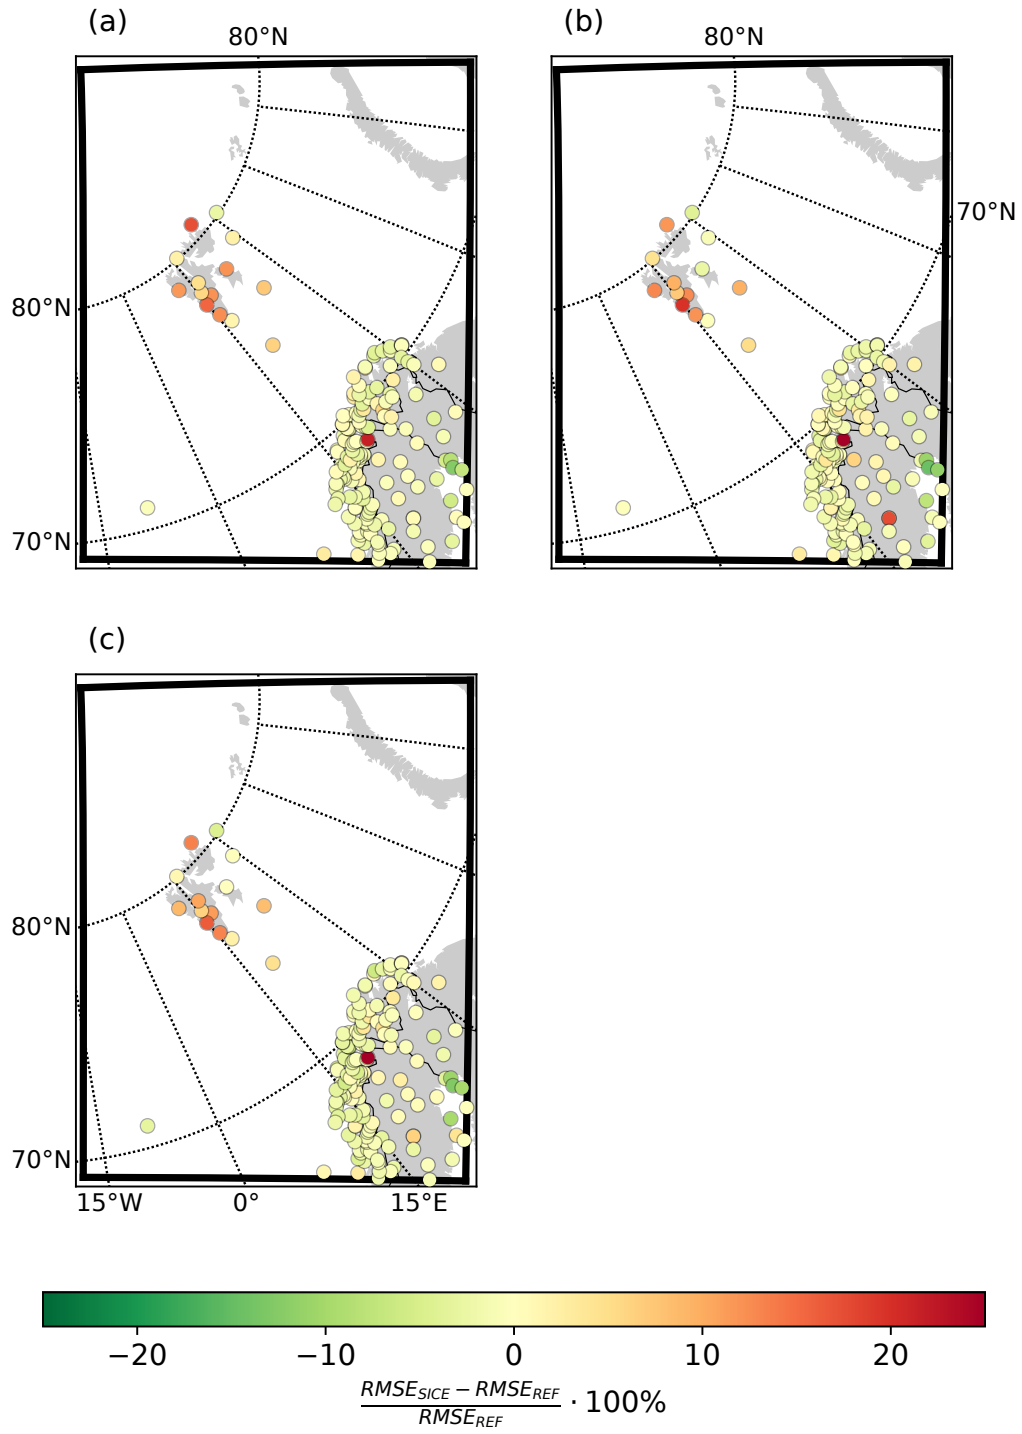

Figure S3: Same as Fig. S1 but for 10 metre wind speed.

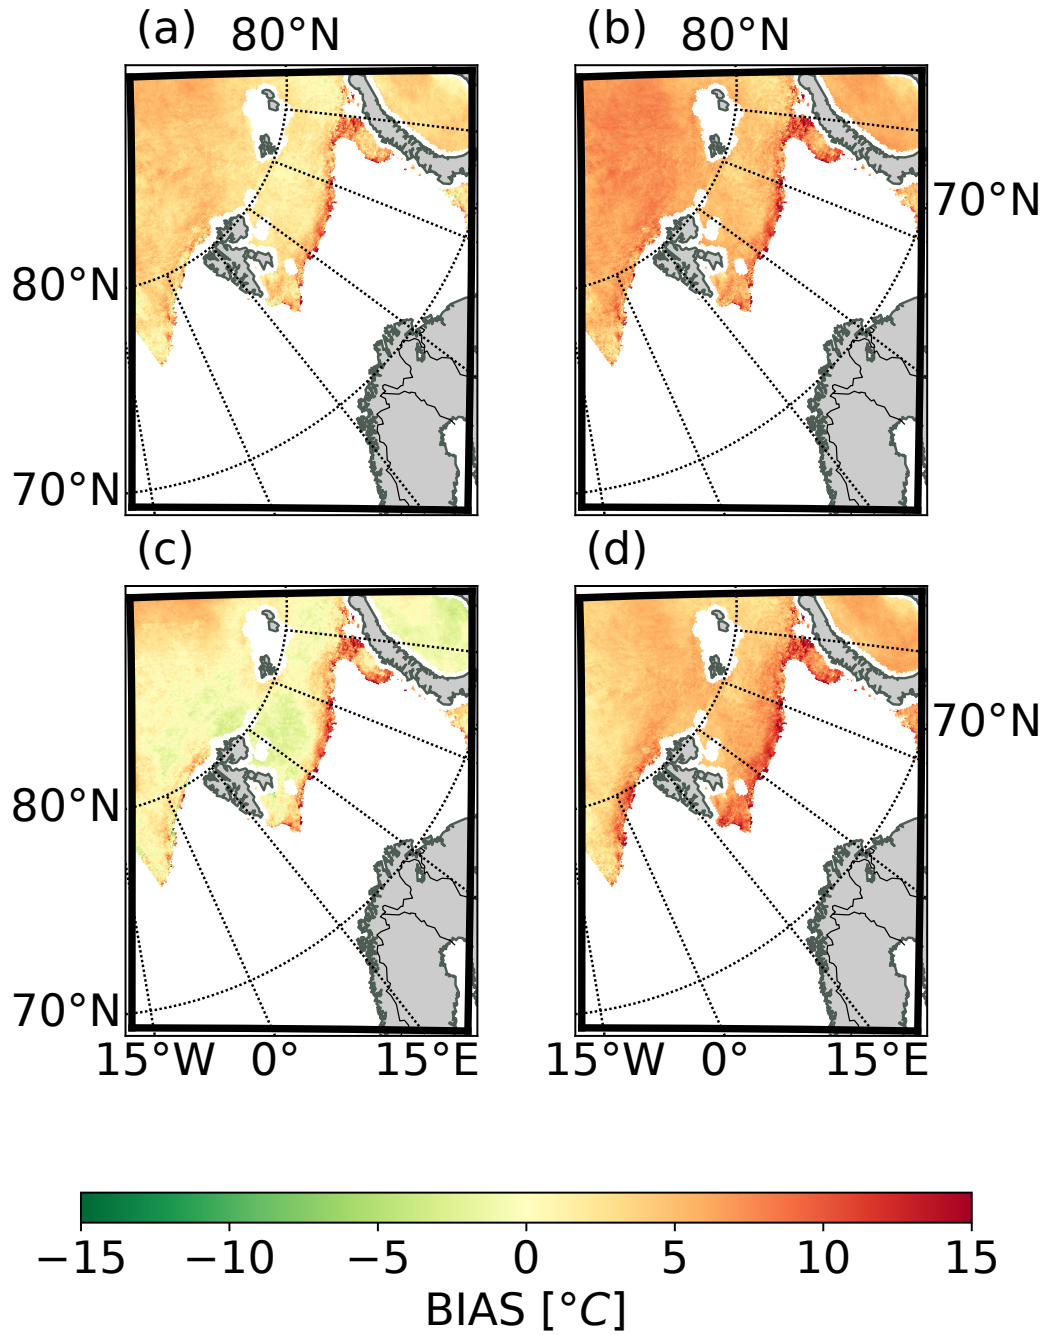

Figure S4: Spatial distribution of the mean error of the ice surface temperature for HARMONIE-AROME experiments REF, SICE2D-NS, SICE2D-S and SICE2D-NS-CLIM after 24 hours of forecast compared to VIIRS ice surface temperature product over the time period from 1 March 2013 to 30 April 2013. The mean error is calculated as the forecasted value minus observed value. a) REF; b) SICE2D-NS; c) SICE2D-S; d) SICE2D-NS-CLIM.

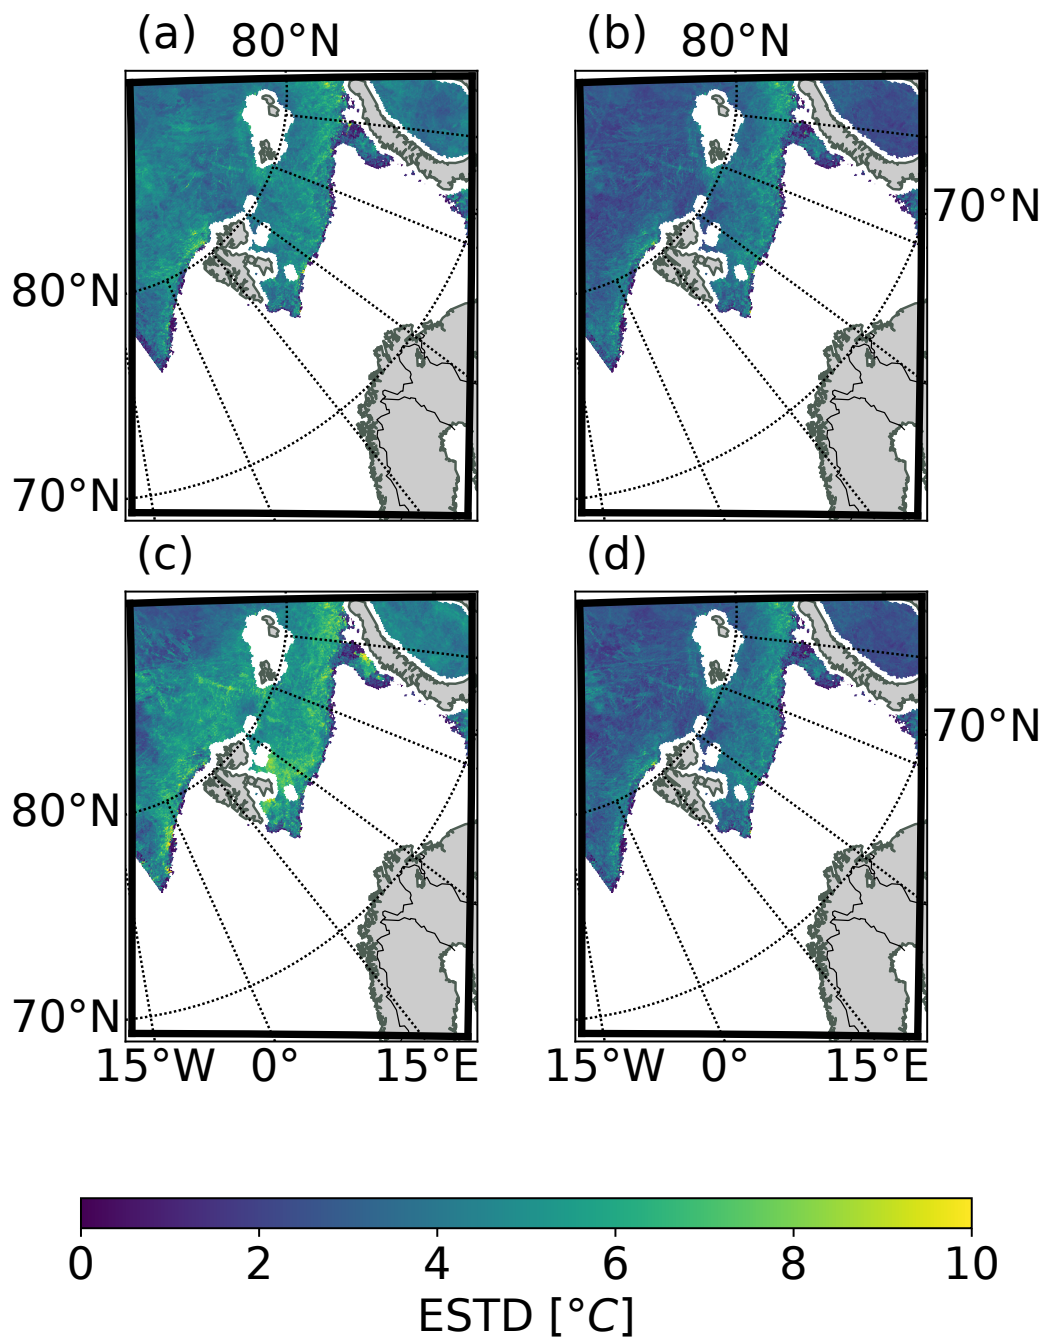

Figure S5: Same as Fig. S1 but showing the spatial distribution of the standard deviation of errors.

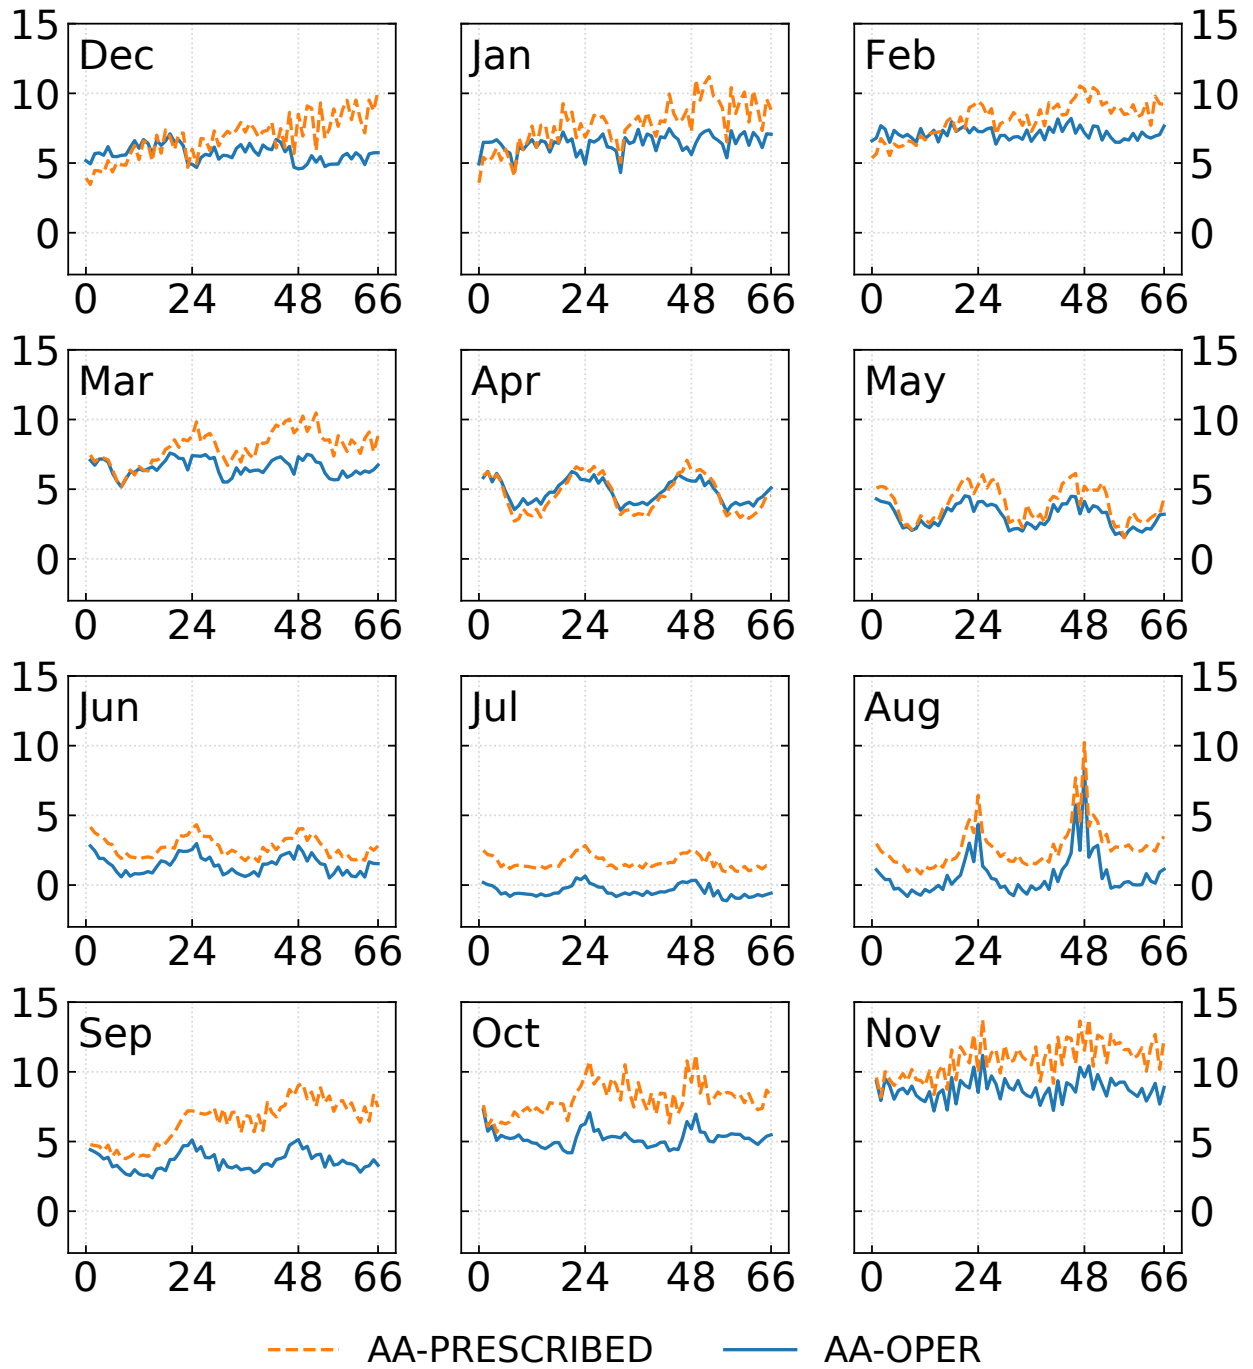

Figure S6: Monthly values of the mean error as a function of lead time for AA-PREScribed and AA-OPER forecasts initialized at 0000 UTC compared to MODIS ice surface temperature product over the time period from 1 December 2015 to 1 December 2016. X-axis – forecast lead time from 0000 UTC (h); Y-axis – ice surface temperature mean error (°C).

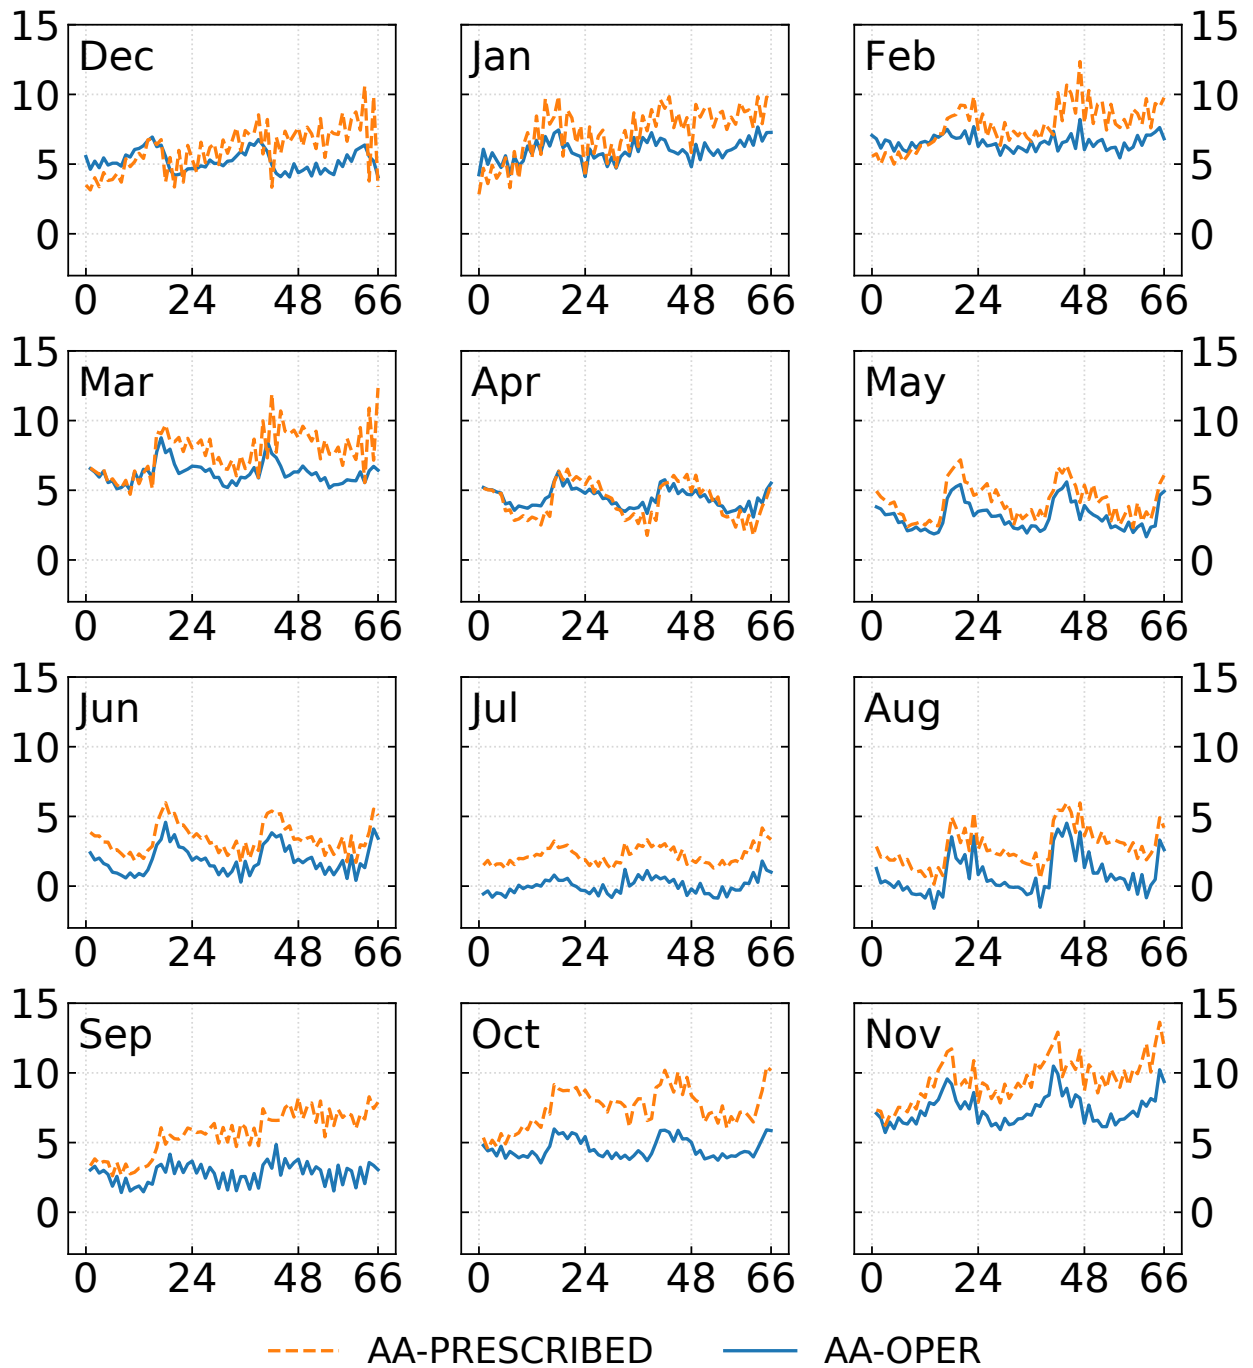

Figure S7: Monthly values of the mean error as a function of lead time for AA-PREScribed and AA-OPER (snow-free SICE configuration) forecasts initialized at 0000 UTC compared to VIIRS ice surface temperature product over the time period from 1 December 2015 to 1 December 2016. X-axis – forecast lead time from 0000 UTC (h); Y-axis – ice surface temperature mean error ( $^{\circ}\text{C}$ ).

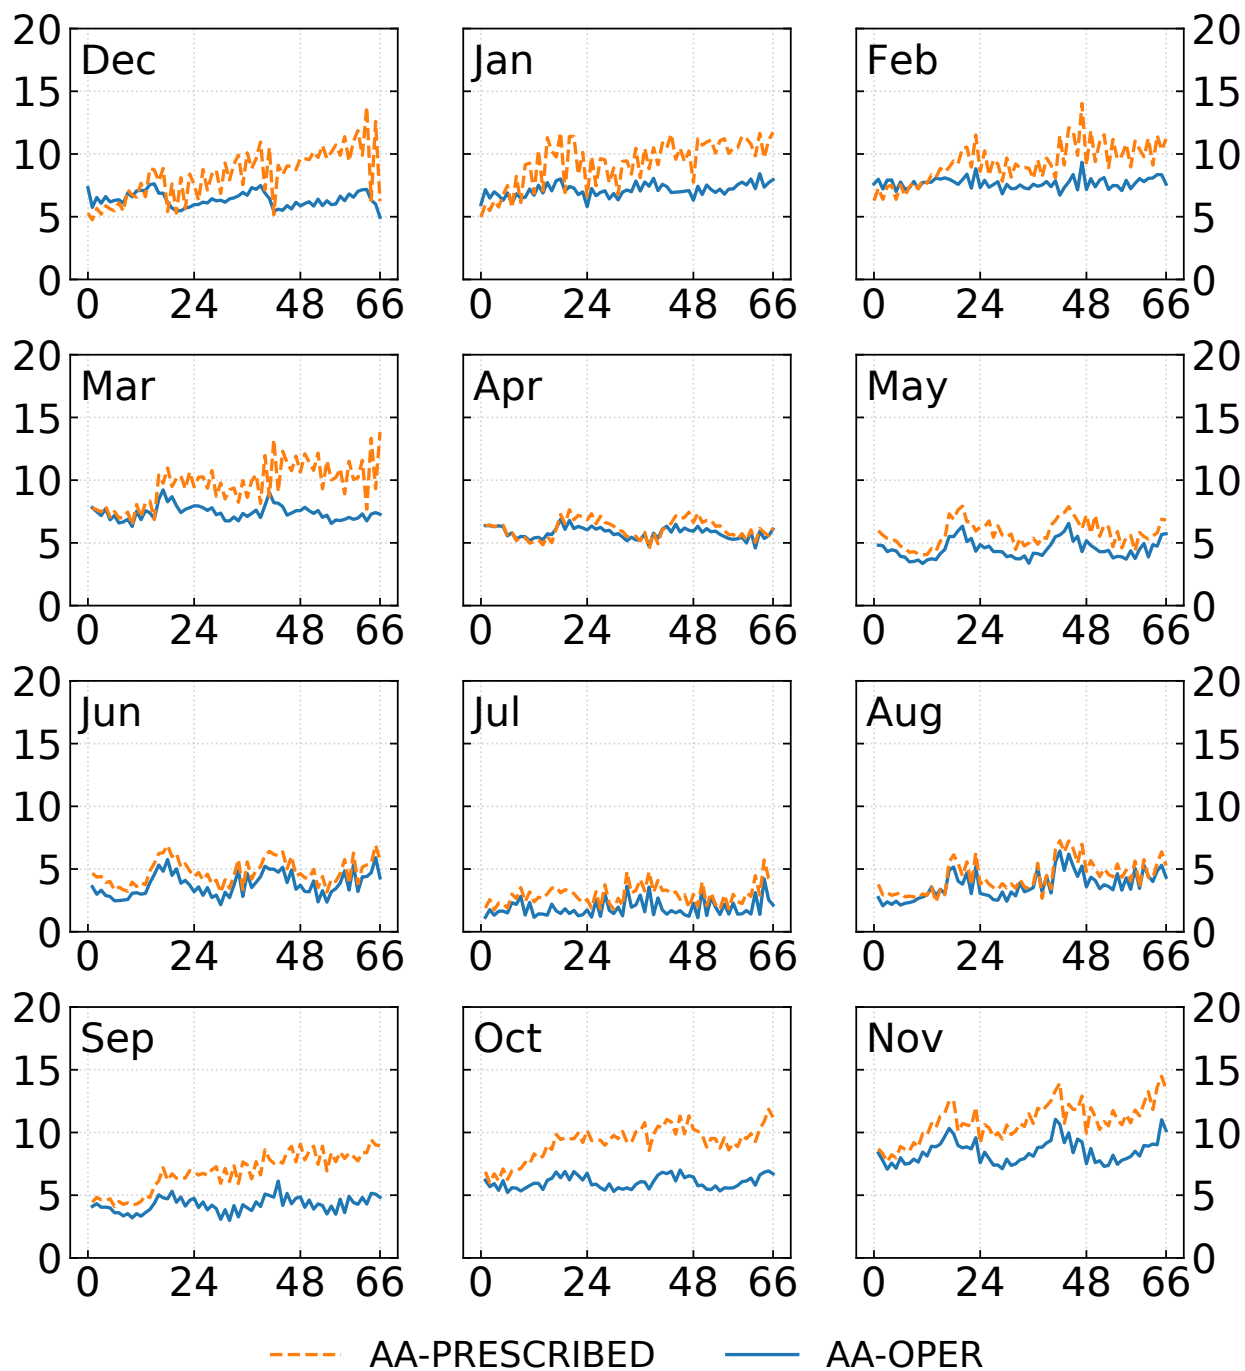

Figure S8: Same as Fig. S7 but showing the root mean square error (RMSE).
